# Supplementary material for: Effects of aerobic exercise on executive function among overweight and obese children: a systematic review and meta-analysis
Source: Frontiers journal article supplement (doi:10.3389/fpsyg.2024.1485610), 2024-10-28

# Appendix B. Forest Plots

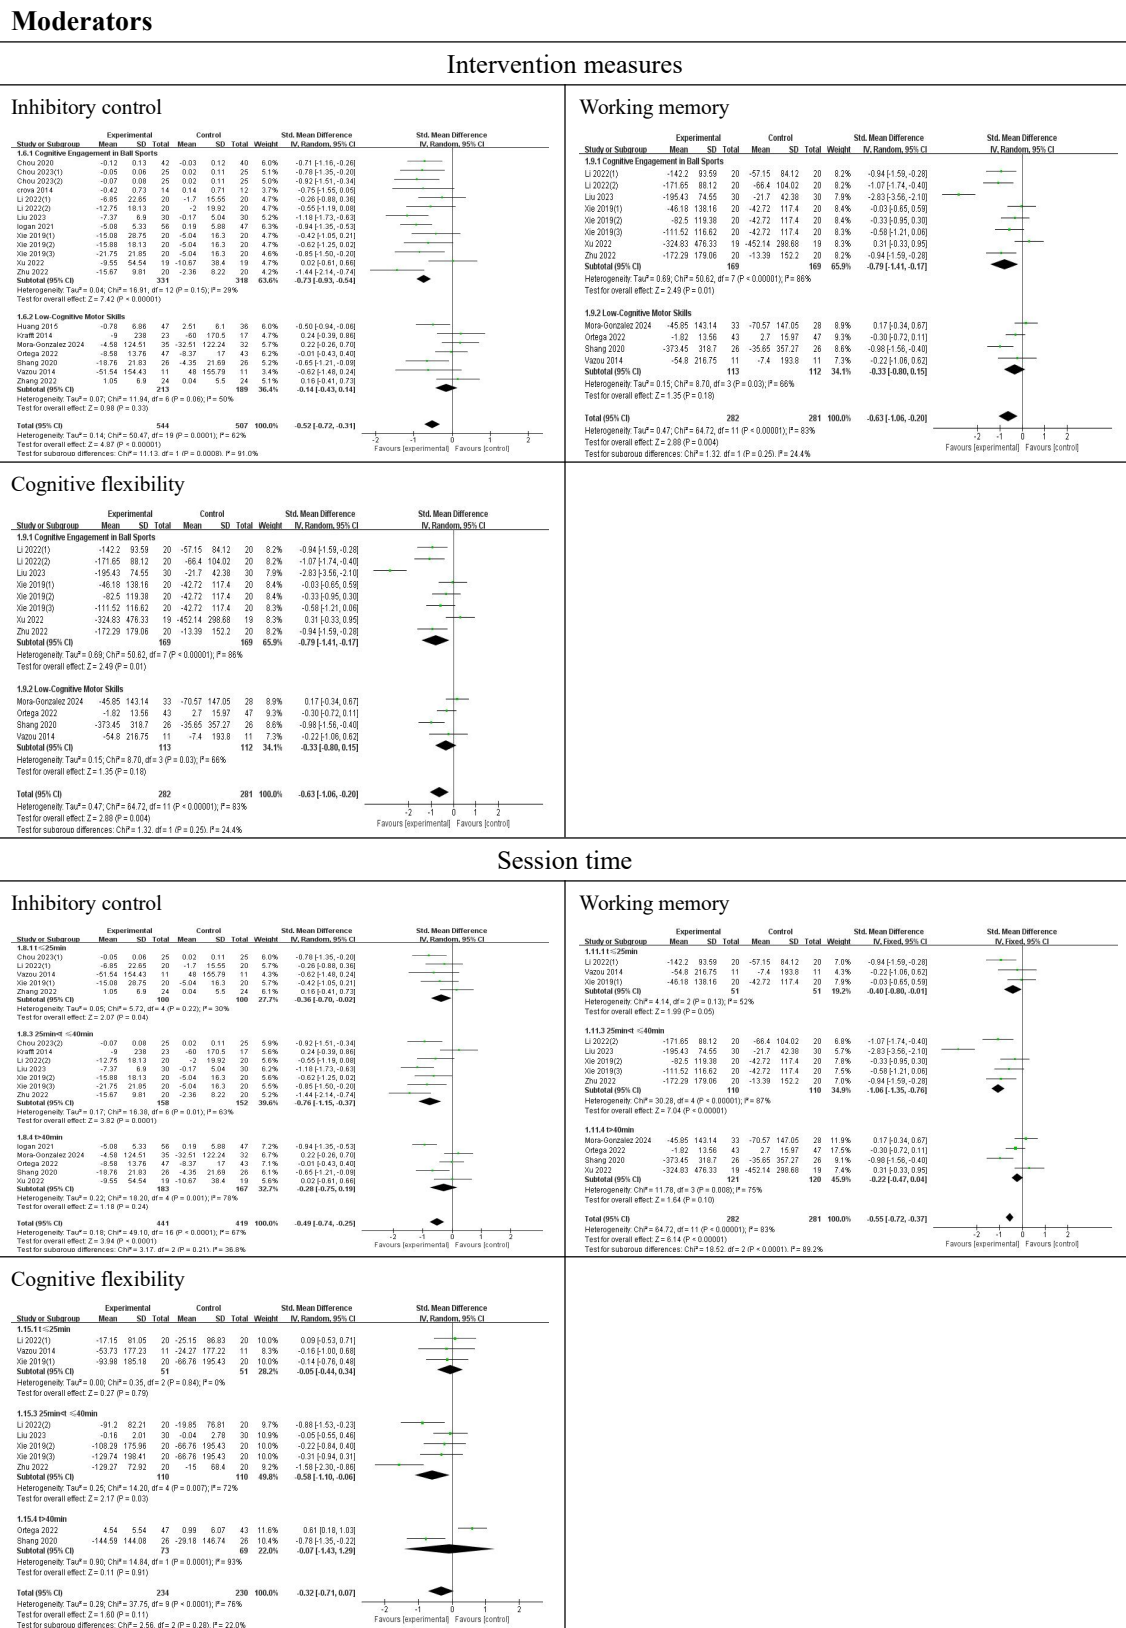

## Intervention intensity

### Inhibitory control

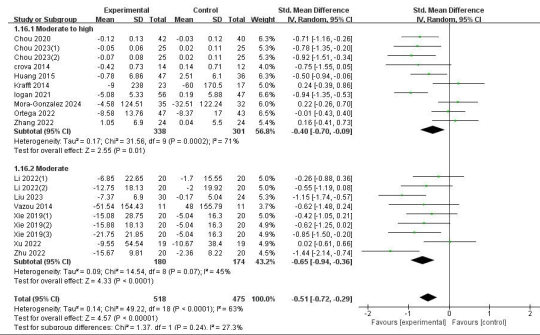

### Working memory

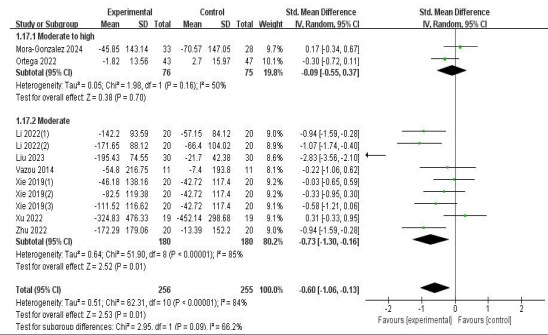

### Cognitive flexibility

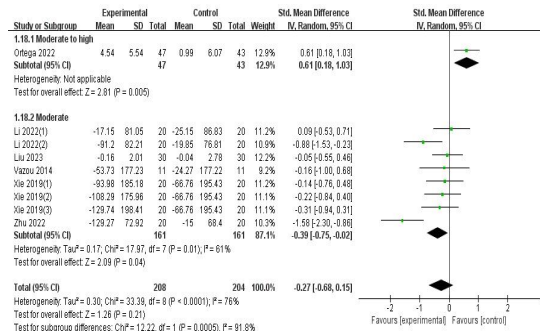

## BMI

### Inhibitory control

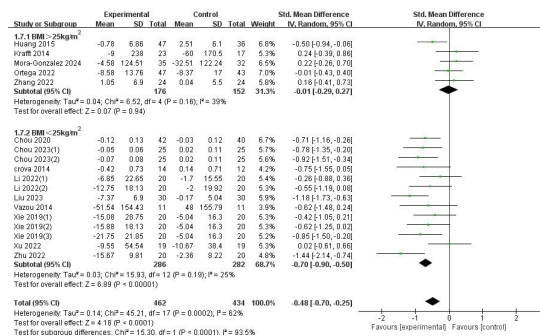

### Working memory

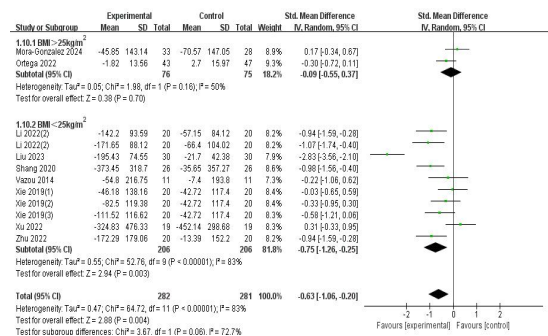

Supplement: Data_Sheet_2.pdf [file Data_Sheet_2.pdf]
